# Supplementary material
Source: PubMed Central journal article supplement (PMC5376241)

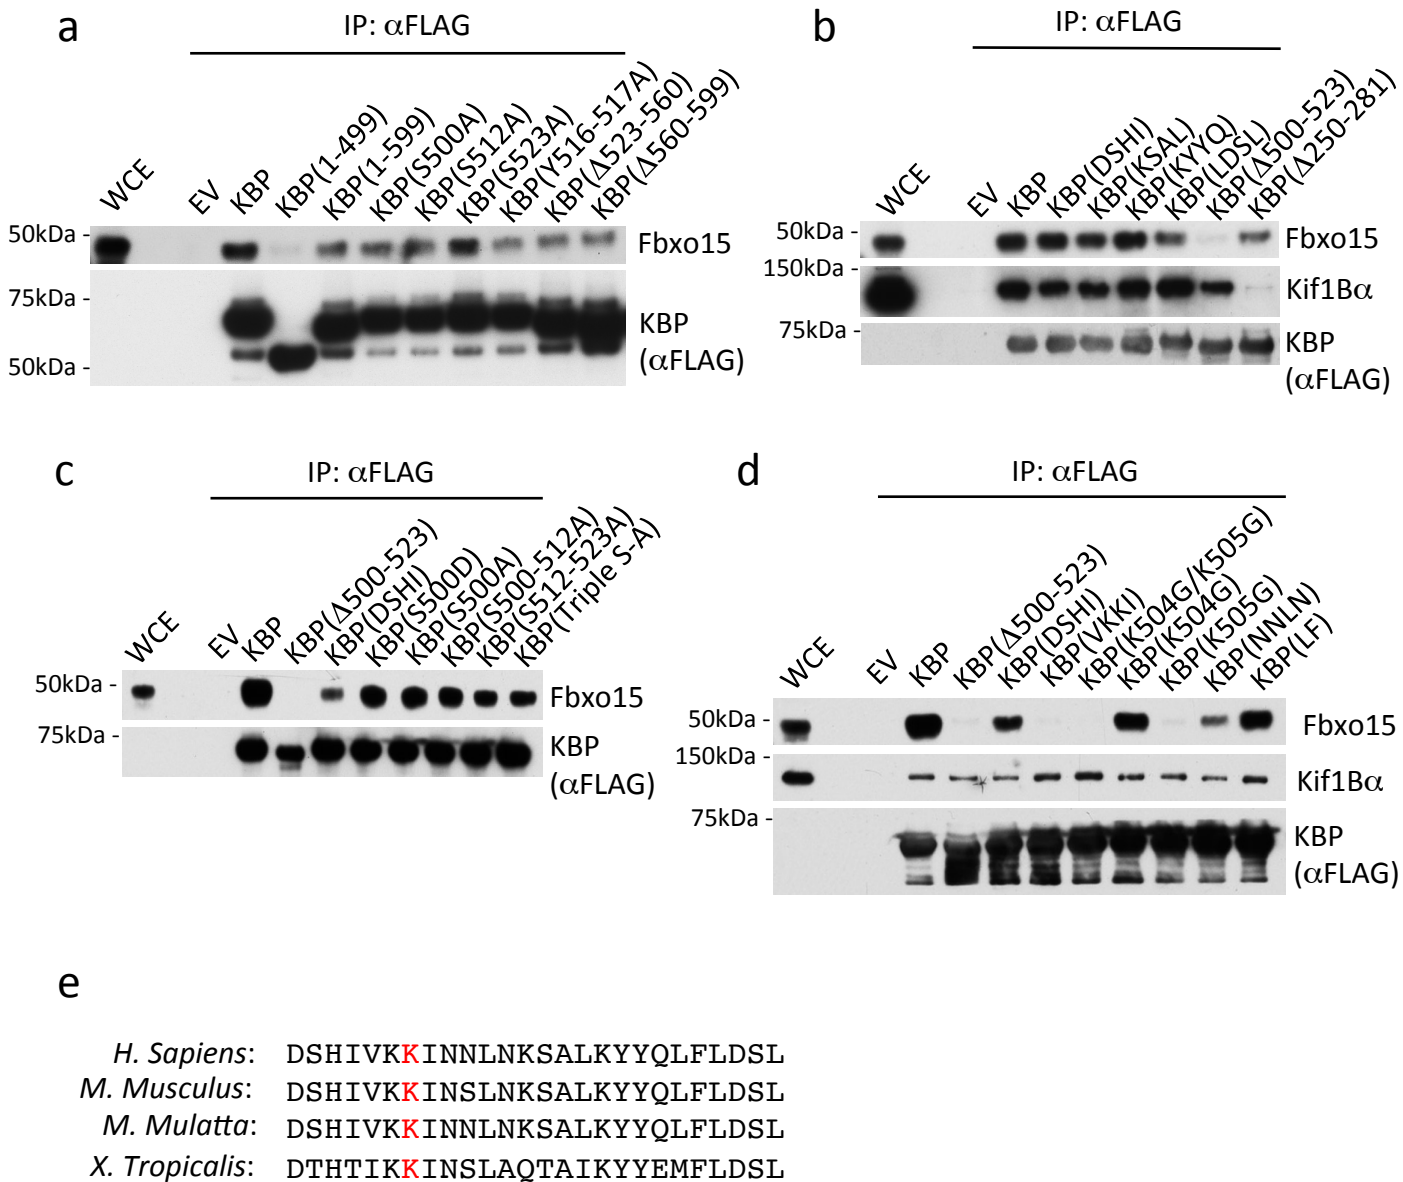

f

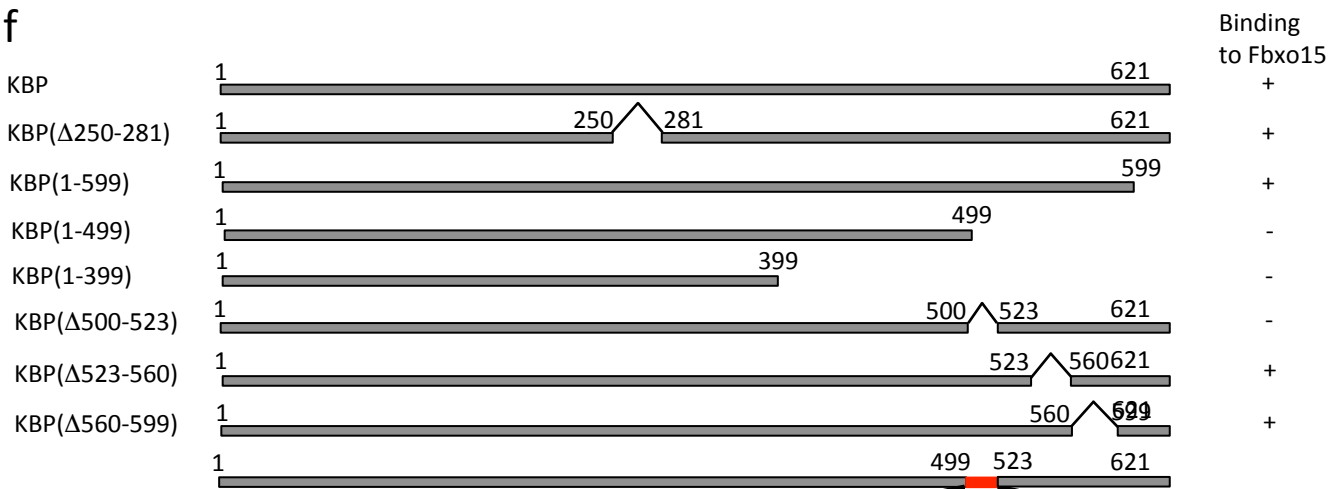

|                 |                            |     |
|-----------------|----------------------------|-----|
|                 | DSHIVKKINNLNKSALKYYQLFLDSL | +   |
| KBP(DSHI)       | AAAVKKINNLNKSALKYYQLFLDSL  | +/- |
| KBP(VKKI)       | DSHIAAAANLNKSALKYYQLFLDSL  | -   |
| KBP(NNLN)       | DSHIVKKIAAAKSAKYYQLFLDSL   | +/- |
| KBP(KSAL)       | DSHIVKKINNLNAAAAKYYQLFLDSL | +   |
| KBP(KYYQ)       | DSHIVKKINNLNKSALAAAALFLDSL | +   |
| KBP(LF)         | DSHIVKKINNLNKSALKYYQAALDSL | +   |
| KBP(LDSL)       | DSHIVKKINNLNKSALKYYQLFAAAA | +   |
| KBP(DS/AA)      | AAHIVKKINNLNKSALKYYQLFLDSL | +   |
| KBP(S500A)      | DAHIVKKINNLNKSALKYYQLFLDSL | +   |
| KBP(S512A)      | DSHIVKKINNLNKAALKYYQLFLDSL | +   |
| KBP(S523A)      | DSHIVKKINNLNKSALKYYQLFLDAL | +   |
| KBP(S512-523A)  | DSHIVKKINNLNKAALKYYQLFLDAL | +   |
| KBP(Triple S/A) | DAHIVKKINNLNKAALKYYQLFLDAL | +   |
| KBP(Y516-517A)  | DSHIVKKINNLNKSALKAAQLFLDSL | +   |
| KBP(Y516A)      | DSHIVKKINNLNKSALKAYQLFLDSL | +   |
| KBP(Y517A)      | DSHIVKKINNLNKSALKYAQLFLDSL | +   |
| KBP(S500D)      | DDHIVKKINNLNKSALKYYQLFLDSL | +   |
| KBP(K504-505G)  | DSHIVGGINNLNKSALKYYQLFLDSL | -   |
| KBP(K504G)      | DSHIVGKINNLNKSALKYYQLFLDSL | +/- |
| KBP(K504A)      | DSHIVAKINNLNKSALKYYQLFLDSL | +/- |
| KBP(K504R)      | DSHIVRKINNLNKSALKYYQLFLDSL | +   |
| KBP(K505G)      | DSHIVKGINNLNKSALKYYQLFLDSL | -   |
| KBP(K505A)      | DSHIVKAINNLNKSALKYYQLFLDSL | -   |
| KBP(K505H)      | DSHIVKHINNLNKSALKYYQLFLDSL | -   |
| KBP(K505R)      | DSHIVKRINNLNKSALKYYQLFLDSL | +/- |
| KBP(KK/RR)      | DSHIVRRINNLNKSALKYYQLFLDSL | -   |

g

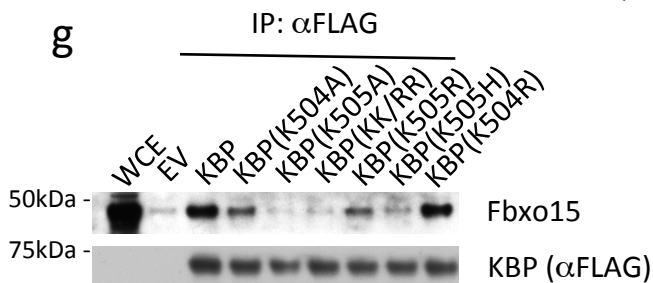

h

| Position    | PTM                | Tot. Spectra | Mod. Spectra | Mod.%       |
|-------------|--------------------|--------------|--------------|-------------|
| T292        | Phosphorylation    | 354          | 16           | 4.52        |
| K316        | Acetylation        | 7            | 3            | 42.86       |
| K360        | Acetylation        | 160          | 2            | 1.25        |
| K361        | Acetylation        | 451          | 22           | 11.31       |
| S500        | Phosphorylation    | 164          | 10           | 6.1         |
| <b>K505</b> | <b>Acetylation</b> | <b>164</b>   | <b>6</b>     | <b>3.66</b> |
| K511        | Acetylation        | 27           | 1            | 3.70        |
| K515        | Acetylation        | 23           | 2            | 8.70        |
| K547        | Acetylation        | 54           | 5            | 9.26        |
| K556        | Acetylation        | 213          | 7            | 3.29        |
| K564        | Acetylation        | 580          | 33           | 3.88        |

i

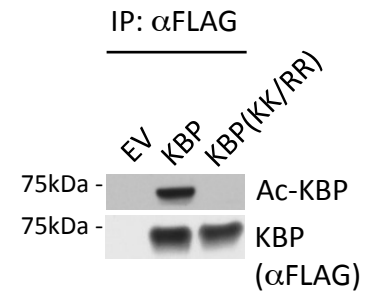

Supplement: NIHMS852359-supplement-3.pdf [file NIHMS852359-supplement-3.pdf]
