# Supplementary material
Source: PubMed Central journal article supplement (PMC5376241)

**a**

| Protein | dNSAF    | Protein | dNSAF    |
|---------|----------|---------|----------|
| Fbxo15  | 0.04721  | Fbxo21  | 0.031288 |
| Skp1    | 0.07519  | Skp1    | 0.1498   |
| Cul1    | 0.01805  | Cul1    | 0.002008 |
| KBP     | 0.000149 | KBP     | 0        |

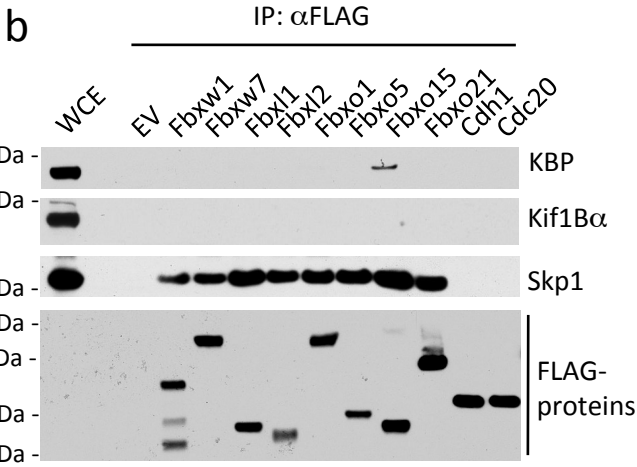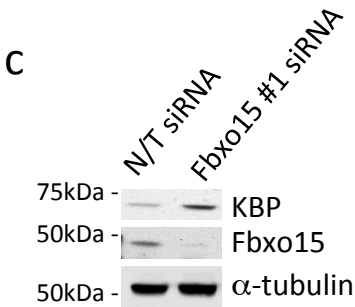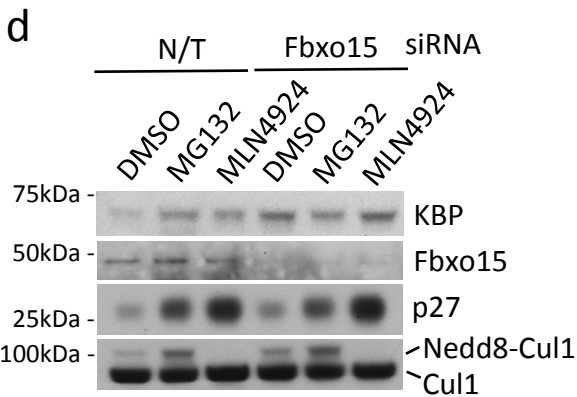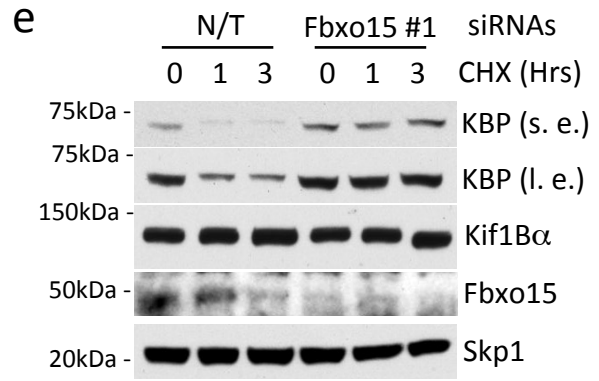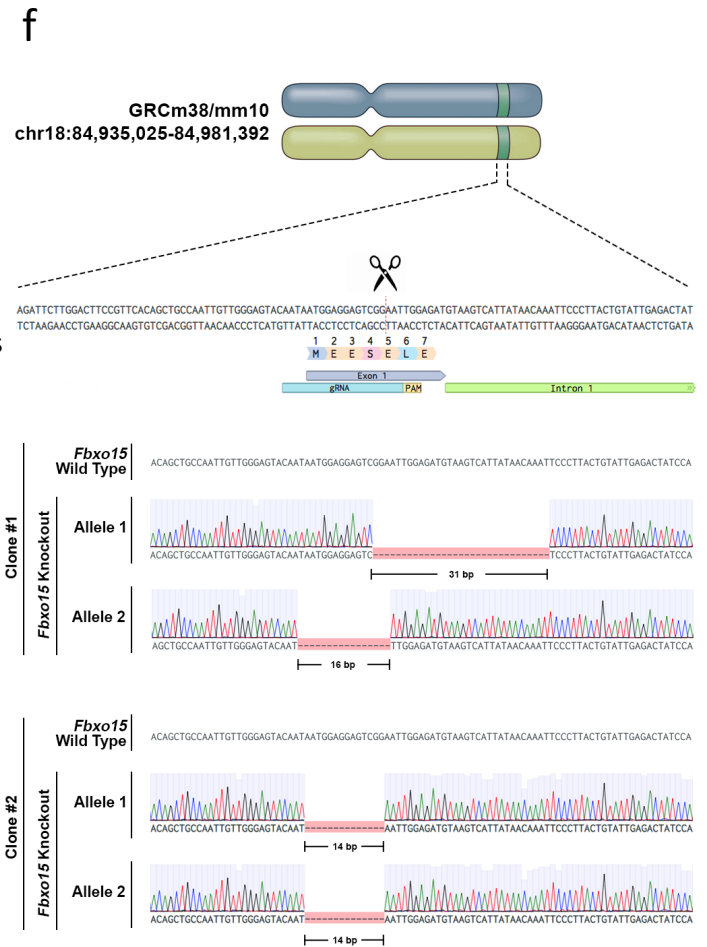

Supplement: NIHMS852359-supplement-2.pdf [file NIHMS852359-supplement-2.pdf]

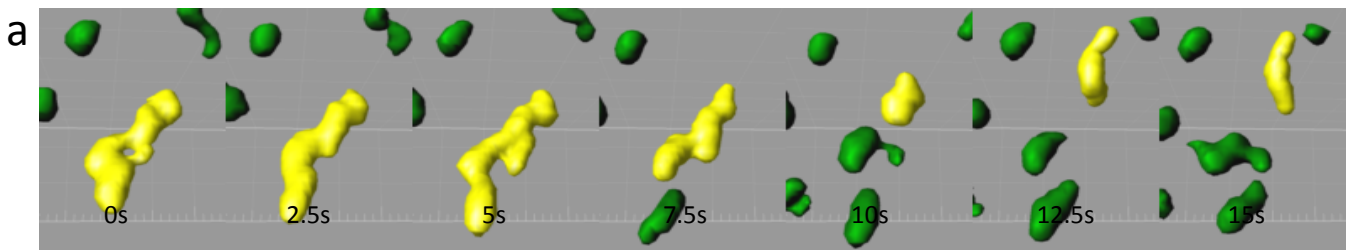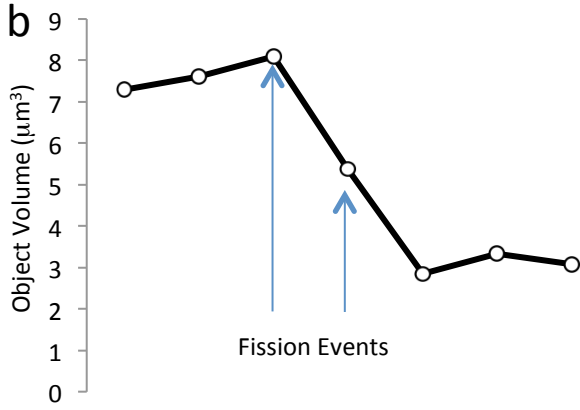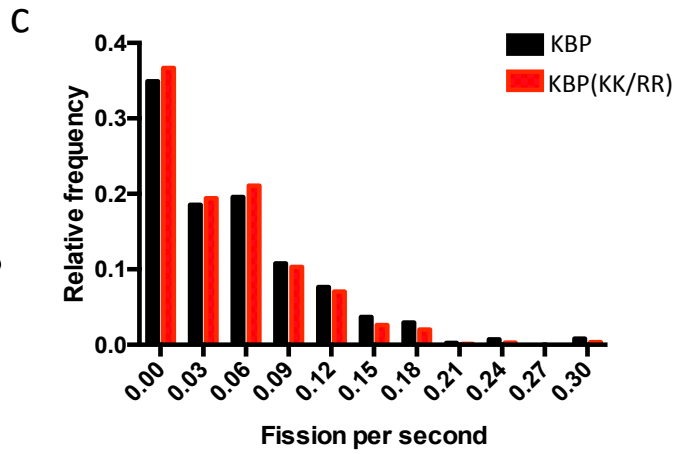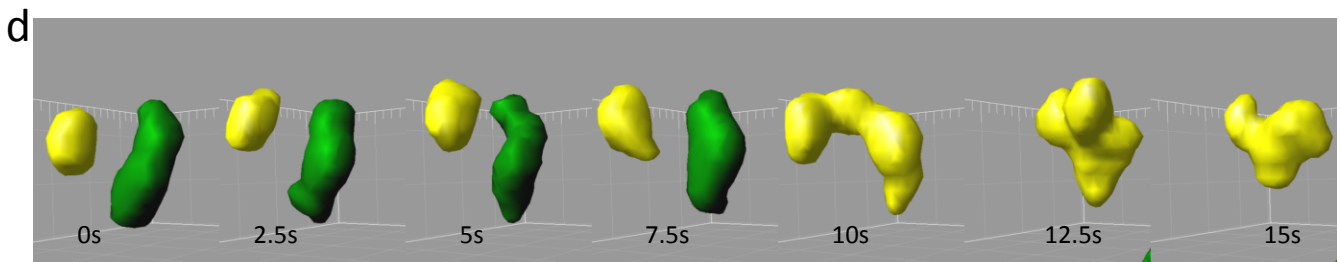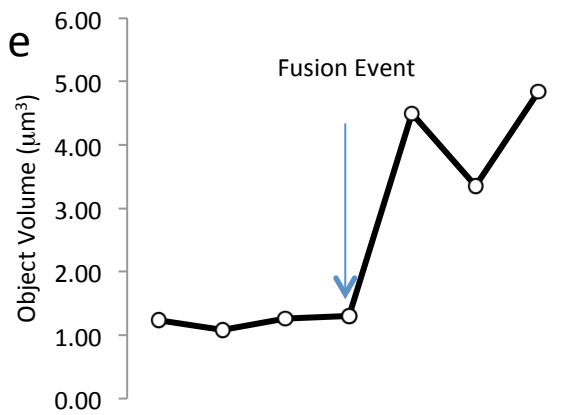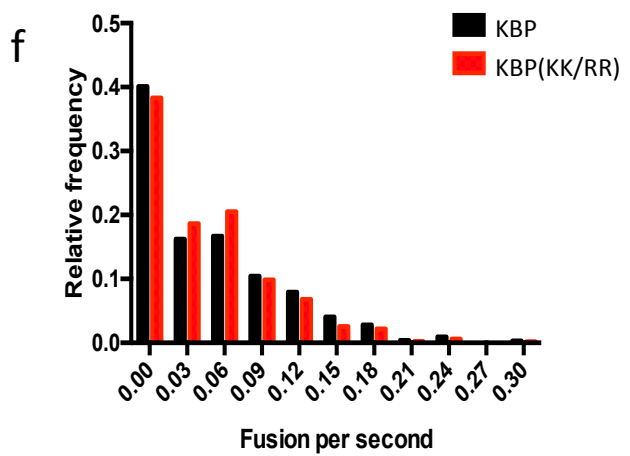

Supplement: NIHMS852359-supplement-7.pdf [file NIHMS852359-supplement-7.pdf]

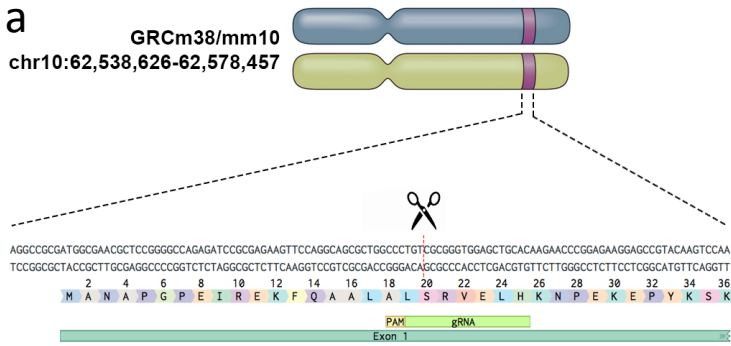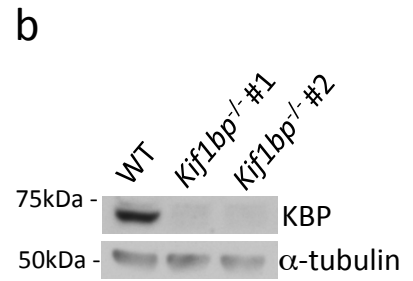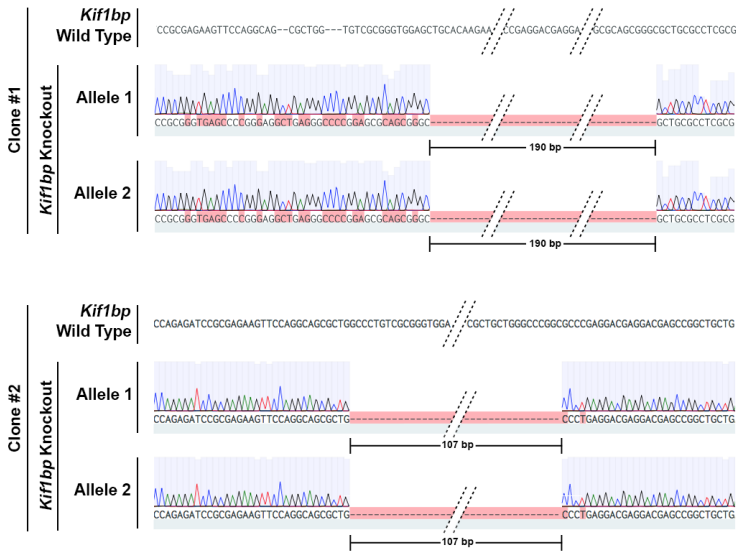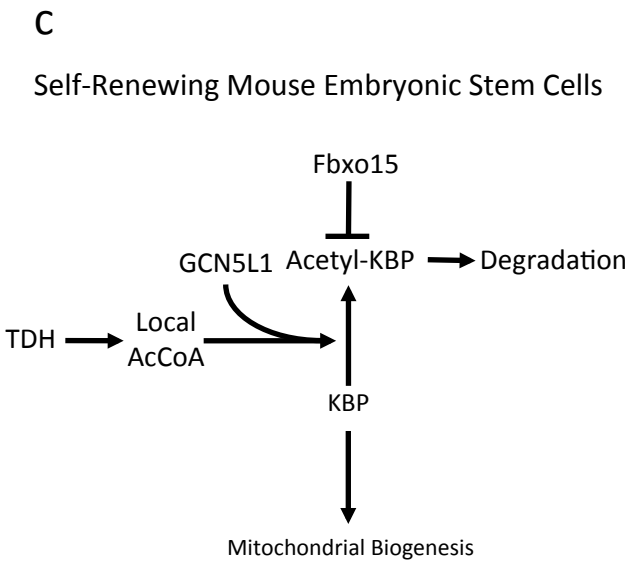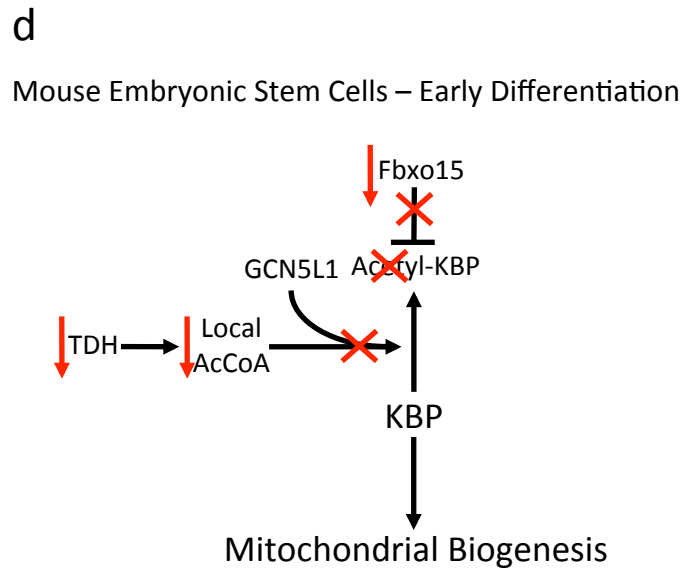

Supplement: NIHMS852359-supplement-8.pdf [file NIHMS852359-supplement-8.pdf]
